# Supplementary material for: Metabolomic profiles of hepatocellular carcinoma in a European prospective cohort
Source: Springer Nature journal article supplement (doi:10.1186/s12916-015-0462-9), 2015-09-23
Supplement: MOESM1 [file 9759074]

***Metabolomic Profiles of Hepatocellular Carcinoma in a European Prospective Cohort***

This document contains :

1. Supplementary methods for the NMR data acquisition.
2. Supplementary table 1.
3. Supplementary figures 1, 2 & 3.

**Supplementary methods for NMR metabolomic data acquisition**

*Serum sample preparation.* Serum samples originally stored at IARC in cryostraws were delivered to the CRMN and were aliquoted into 200 µl tubes and stored at -80 °C until NMR profiling. Serum samples from Denmark and Sweden were directly stored at -80 °C until NMR analysis. All samples underwent the same number of freeze/thaw cycles between collection and NMR analysis. The analysis order of samples was randomized by country and matched cases and controls were analyzed consecutively in the same batch. Additionally, quality control (QC) serum samples were included to monitor the stability and reproducibility of the NMR data acquisition over the entire NMR experimental campaign as described in a previous paper (1). Before NMR data acquisition, all EPIC serum samples and QC serum samples were thawed at room temperature and processed according to standard protocols (2). In brief, 200 µl of serum was mixed with 400 µl of saline solution (0.9% NaCl in 10% D2O) and centrifuged at 4 °C, 12 000 g for 5 min. For each sample, 550 µl of supernatant was then transferred into a 5 mm NMR tube.

*Spectral acquisition.* NMR spectra of serum samples were acquired on a Bruker Avance III spectrometer operating at 800.15 MHz  $^1\text{H}$  NMR frequency equipped with a cooled SampleJet for automatic delivery of the samples into the magnet. Samples were stored at 277 K, no more than 24 h in the SampleJet before NMR data acquisition. NMR experiments were carried out using a standard 5 mm TXI probe with the temperature regulated at 300 K. Automatic tuning and matching, frequency-locking on  $\text{D}_2\text{O}$  and 1D gradient shimming were carried out on each sample prior to data acquisition. In addition, automatic 3D gradient shimming was performed every day on a fresh QC serum sample. For proton one-dimensional NMR acquisition, the 1D Carr-Purcell-Meiboom-Gill (CPMG) pulse sequence ( $\text{RD-}90^\circ\text{-}[\tau\text{-}180^\circ\text{-}\tau]_n\text{-FID}$ ) with water presaturation during the recycle delay was used with  $\tau = 300 \mu\text{s}$  and  $n = 128$  (76.8ms total echo time). For NOESY experiments, the mixing time was set to 100ms. For each experiment, 128 free induction decays (FID) were collected with 43 k data points and a spectral width of 20 ppm. The total acquisition time and the recycle delay were respectively set to 1.36 s and to 2 s. The  $90^\circ$  pulse length was automatically calibrated for each sample and corresponded to  $\sim 12 \mu\text{s}$  for 26 W. FIDs were multiplied by an exponential function, equivalent to a 0.3 Hz line-broadening factor before Fourier transformation. In addition, two-dimensional NMR experiments were recorded for a set of representative samples included  $^1\text{H}$  J-resolved,  $^1\text{H}$ - $^1\text{H}$  TOCSY (total correlation spectroscopy) and  $^1\text{H}$ - $^{13}\text{C}$  HSQC (heteronuclear single quantum coherence) for metabolites assignment.

*Processing of the spectra.*  $^1\text{H}$  chemical shifts of the serum spectra were automatically referenced to the anomeric proton doublet signal of  $\alpha$ -glucose ( $\delta$  5.23 ppm). Spectra were manually phased, corrected for baseline using Topspin 3.1 (Bruker GmbH,

Rheinstetten, Germany), residual water signal ( $\delta$  4.35-5.15 ppm) and polyethylene glycol signal ( $\delta$  3.69-3.71ppm) were removed (corresponding variables set to zero) and spectra were normalized to the sum of intensities. NMR variables were Pareto scaled, i.e. each bucket was mean-centered and divided by the square root of its standard deviation, and spectra were further normalized for systematic variation introduced between the different NMR sessions (1).

1. Fages A, Pontoizeau C, Jobard E, Levy P, Bartosch B, Elena-Herrmann B. Batch profiling calibration for robust NMR metabonomic data analysis. *Analytical and Bioanalytical Chemistry*. **2013**, *405*, 8819-8827.
2. Beckonert O, Keun HC, Ebbels TMD, Bundy JG, Holmes E, Lindon JC, et al. Metabolic profiling, metabolomic and metabonomic procedures for NMR spectroscopy of urine, plasma, serum and tissue extracts. *Nature Protocols*. **2007**, *2*, 2692-2703.

**Supplementary Table 1.** Metabolites identified in serum samples.

| Metabolite                                    | <sup>1</sup> H ppm | <sup>13</sup> C ppm | Signal multiplicity | Observed by NMR          |
|-----------------------------------------------|--------------------|---------------------|---------------------|--------------------------|
| Cholesterol                                   | 0.7                | 14.3                | m                   | CPMG, J-Res, TOCSY, HSQC |
| Lipids CH <sub>3</sub> , HDL                  | 0.82               |                     | m                   | CPMG, J-Res, TOCSY, HSQC |
| Lipids CH <sub>3</sub> , LDL                  | 0.84               | 16.5                | m                   | CPMG, J-Res, TOCSY, HSQC |
| Lipids CH <sub>3</sub> , VLDL                 | 0.86               | 25.2                | m                   | CPMG, J-Res, TOCSY, HSQC |
| Leucine                                       | 0.94               | 23.6                | d                   | CPMG, J-Res, TOCSY, HSQC |
| Isoleucine                                    | 0.93               | 13.7                | t                   | CPMG, J-Res, TOCSY, HSQC |
|                                               | 0.99               | 17.4                | d                   |                          |
| Valine                                        | 0.98               | 19.9                | d                   | CPMG, J-Res, TOCSY, HSQC |
|                                               | 1.02               | 20.7                | d                   |                          |
| Propylene glycol                              | 1.13               |                     | d                   | CPMG, J-Res              |
| Ethanol                                       | 1.16               |                     | t                   | CPMG, J-Res, TOCSY, HSQC |
|                                               | 3.64               |                     | q                   |                          |
| 3-hydroxybutyrate                             | 1.20               | 24.5                | d                   | CPMG, J-Res, TOCSY, HSQC |
| Lipids CH <sub>2n</sub> , LDL                 | 1.25               | 34.5                | m                   | CPMG, J-Res, TOCSY, HSQC |
| Lipids CH <sub>2n</sub> , VLDL                | 1.27               | 32.3                | m                   | CPMG, J-Res, TOCSY, HSQC |
| Lactate                                       | 1.33               | 22.9                | d                   | CPMG, J-Res, TOCSY, HSQC |
|                                               | 4.11               | 71.3                | q                   |                          |
| Lysine                                        | 1.46               |                     | m                   | CPMG, J-Res, TOCSY       |
| Alanine                                       | 1.48               | 19.0                | d                   | CPMG, J-Res, TOCSY, HSQC |
| Lipids CH <sub>2</sub> -CH <sub>2</sub> -COOC | 1.57               | 27.5                | m                   | CPMG, J-Res, TOCSY, HSQC |
| Acetate                                       | 1.91               | 25.9                | s                   | CPMG, J-Res, TOCSY, HSQC |
| Lipids CH <sub>2</sub> -CH=                   | 2.01               | 29.8                | m                   | CPMG, J-Res, TOCSY, HSQC |
| N-acetyl glycoproteins                        | 2.02               | 24.8                | m                   | CPMG, J-Res, TOCSY, HSQC |
| methionine                                    | 2.14               | 16.6                | m                   | CPMG, J-Res              |
| CH <sub>2</sub> -CH <sub>2</sub> -COOC        | 2.22               | 36.3                | m                   | CPMG, J-Res, TOCSY, HSQC |
| Acetone                                       | 2.23               | 32.9                | s                   | CPMG, J-Res, TOCSY, HSQC |
| acetoacetate                                  | 2.27               |                     | s                   | CPMG, J-Res              |
| Glutamate                                     | 2.34               |                     | m                   | CPMG, J-Res, TOCSY       |
| Pyruvate                                      | 2.37               |                     | s                   | CPMG, J-Res              |
| Glutamine                                     | 2.45               | 33.7                | m                   | CPMG, J-Res, TOCSY, HSQC |
| Citrate                                       | 2.42               |                     | d                   | CPMG, J-Res, TOCSY       |
|                                               | 2.50               |                     | d                   |                          |
| Lipids =CH-CH <sub>2</sub> -CH=               | 2.72               | 28.2                | m                   | CPMG, J-Res, TOCSY, HSQC |
| Albumine                                      | 2.97               | 42.1                | m                   | CPMG, J-Res, TOCSY, HSQC |
| Creatine                                      | 3.02               |                     | s                   | CPMG, J-Res, TOCSY       |
|                                               | 3.91               |                     | s                   |                          |
| Creatinine                                    | 3.03               |                     | s                   | CPMG, J-Res, TOCSY       |
|                                               | 4.05               |                     | s                   |                          |
| Choline                                       | 3.19               | 56.6                | s                   | CPMG, J-Res, TOCSY, HSQC |
|                                               | 4.07               | 58.4                | m                   |                          |
| Glycerophosphocholine                         | 3.23               | 56.6                | s                   | CPMG, J-Res, TOCSY, HSQC |
| Phosphocholine                                | 3.24               |                     | s                   | CPMG, J-Res, TOCSY       |
| Betaine                                       | 3.27               |                     | s                   | CPMG, J-Res              |
| Glycine                                       | 3.55               |                     | s                   | CPMG, J-Res              |
| Glycerol                                      | 3.57               | 65.4                | m                   | CPMG, J-Res, TOCSY, HSQC |
| Glucose                                       | 3.39               | 72.5                | m                   | CPMG, J-Res, TOCSY, HSQC |
|                                               | 3.44               | 78.7                | m                   |                          |
|                                               | 3.71               | 75.6                | m                   |                          |

|                          |      |       |    |                          |
|--------------------------|------|-------|----|--------------------------|
|                          | 3.82 | 74.2  | m  |                          |
|                          | 3.88 | 65.5  | dd |                          |
|                          | 5.22 | 94.9  | d  |                          |
| Lipids O-CH <sub>2</sub> | 4.26 | 64.4  | m  | CPMG, J-Res, TOCSY, HSQC |
| Mannose                  | 5.18 |       | d  | CPMG, J-Res              |
| Glycerid of lipids       | 5.19 | 71.6  | m  | CPMG, J-Res, TOCSY, HSQC |
| Lipids CH=CH             | 5.28 | 130.5 | m  | CPMG, J-Res, TOCSY, HSQC |
| Tyrosine                 | 6.87 | 118.6 | d  | CPMG, J-Res, TOCSY, HSQC |
|                          | 7.17 | 133.4 | d  |                          |
| Histidine                | 7.75 | 139.1 | m  | CPMG, J-Res, TOCSY, HSQC |
| Phenylalanine            | 7.32 | 131.9 | d  | CPMG, J-Res, TOCSY, HSQC |
|                          | 7.40 |       | d  |                          |
| Formate                  | 8.44 |       | s  | CPMG, J-Res              |

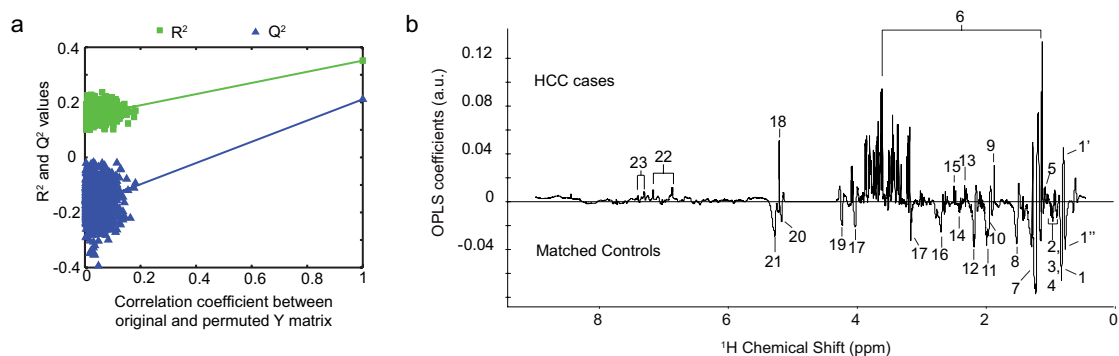

**Supplementary Figure 1.** (a) Validation (1000 resampling) of the O-PLS model based on  $^1\text{H}$  CPMG spectra including all HCC cases ( $n = 114$ ) and the matched controls ( $n = 222$ ). (b) O-PLS metabolic signature obtained from the analysis of  $^1\text{H}$  NOESY NMR spectra. 1,  $\text{CH}_3$  bond of lipids mainly VLDL; 1',  $\text{CH}_3$  bond of lipids mainly LDL; 1'',  $\text{CH}_3$  bond of lipids mainly HDL; 2, Leucine; 3, Isoleucine; 4, Valine; 5, Propylene glycol; 6, Ethanol; 7,  $\text{CH}_2$  bond of lipids; 8,  $\text{CH}_2\text{-CH}_2\text{-COOC}$  bond of lipids; 9, Acetate; 10,  $\text{CH}_2\text{-CH=}$  bond of lipids; 11, N-acetyl glycoproteins; 12, Acetone and  $\text{CH}_2\text{-CH}_2\text{-COOC}$  bond of lipids; 13, Glutamate; 14, Glutamine; 15, citrate; 16,  $\text{=CH-CH}_2\text{-CH=}$  bond of lipids; 17, Choline; 18, Glucose; 19, Lipid O- $\text{CH}_2$ ; 20, mannose and lipids; 21,  $\text{CH=CH}$  bond of lipids; 22, Tyrosine; 23 Phenylalanine.

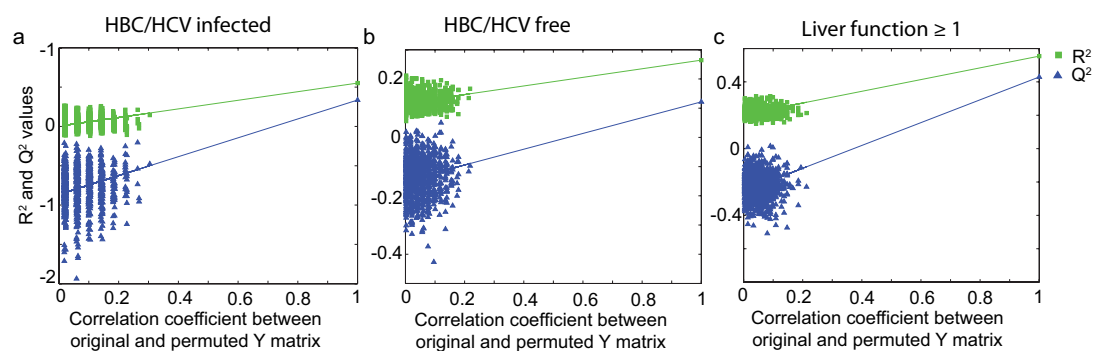

**Supplementary Figure 2.** Validation (1000 resampling) of the O-PLS models stratified by (a) HCC cases infected by HBV/HCV, (b) HCC cases free of hepatitis infection and (c) HCC cases with liver function score  $\geq 1$ .

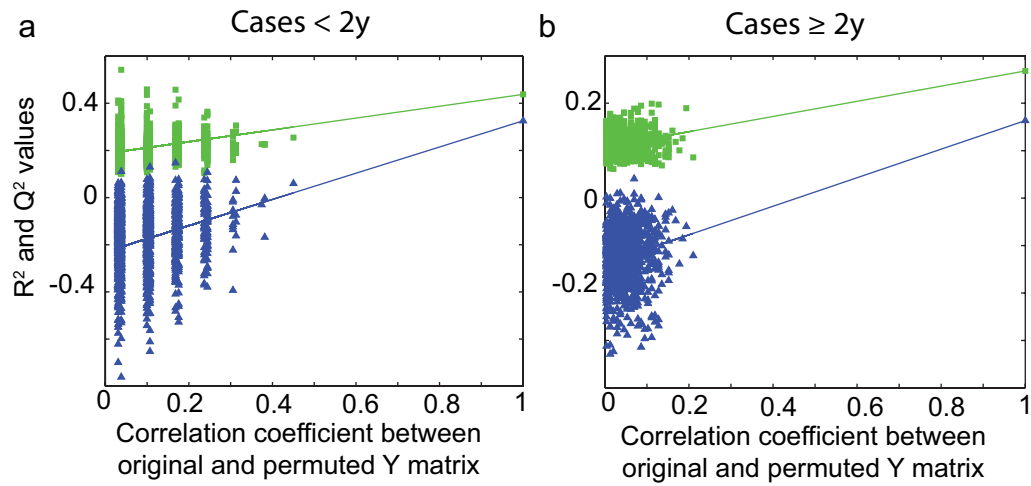

**Supplementary Figure 3.** Validation (1000 resampling) of the O-PLS models based on HCC cases diagnosed (a) <2 years and (b) ≥2 years after blood collection.
